# Supplementary material for: Lithium intercalation mechanisms and critical role of multi-doping in LiFe x Mn 2− x − y Ti y O 4 as high-capacity cathode material for lithium-ion batteries
Source: Royal Society of Chemistry journal article supplement (doi:10.1039/d2tc00573e), 2022-01-01
Supplement: d2tc00573e1.pdf [file d2tc00573e1.pdf]

## Supporting Information

### **Lithium intercalation mechanisms and critical role of multi-doping in $\text{LiFe}_x\text{Mn}_{2-x-y}\text{Ti}_y\text{O}_4$ as high-capacity cathode material for Lithium-ion batteries**

D. Callegari<sup>1</sup>, M. Coduri<sup>1</sup>, M. Fracchia<sup>1</sup>, P. Ghigna<sup>1</sup>, L. Braglia<sup>2</sup>, U. Anselmi Tamburini<sup>1</sup> and E. Quartarone<sup>1,\*</sup>

<sup>1</sup>*Department of Chemistry and INSTM-GISEL, University of Pavia, Via Taramelli 16 27100 Pavia, Italy*

<sup>2</sup>*CNR - Istituto Officina dei Materiali, TASC, I-34149 Trieste, Italy*

*\*Corresponding author: [eliana.quartarone@unipv.it](mailto:eliana.quartarone@unipv.it)*

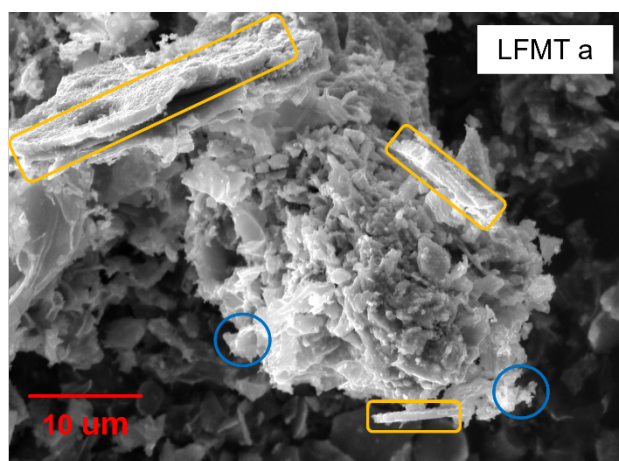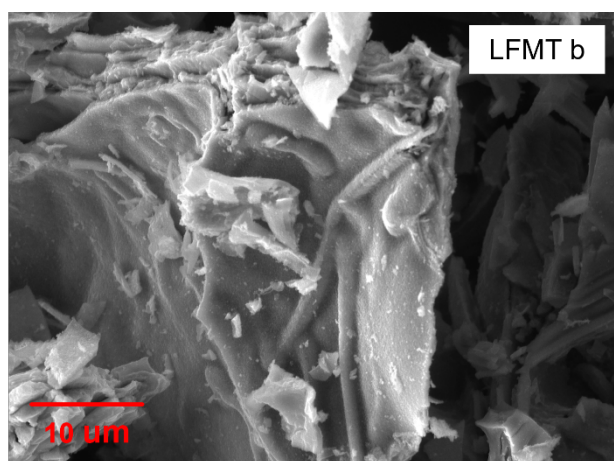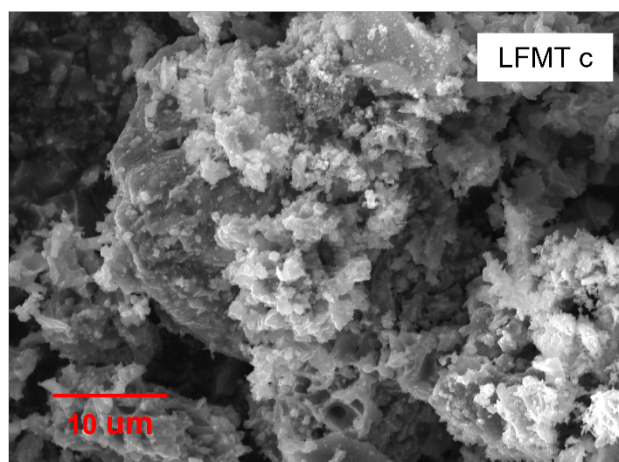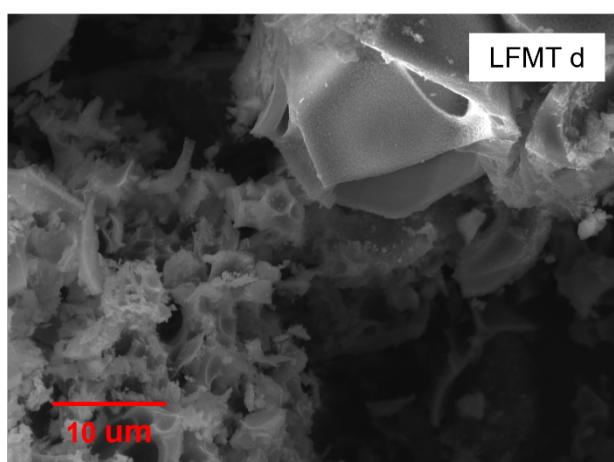

**Figure S1:** SEM image of the pristine LFMT sample prepared via sol–gel route and calcination at low temperature

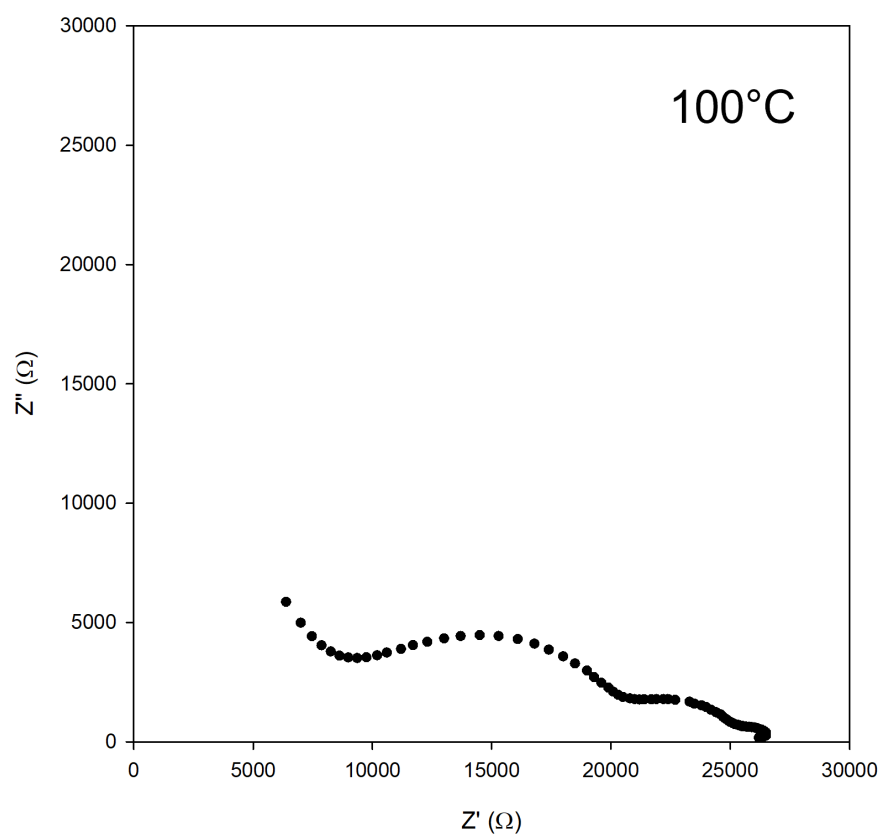

**Figure S2(I):** Impedance spectrum of a LFMT c pellet, recorded/obtained at 100°C

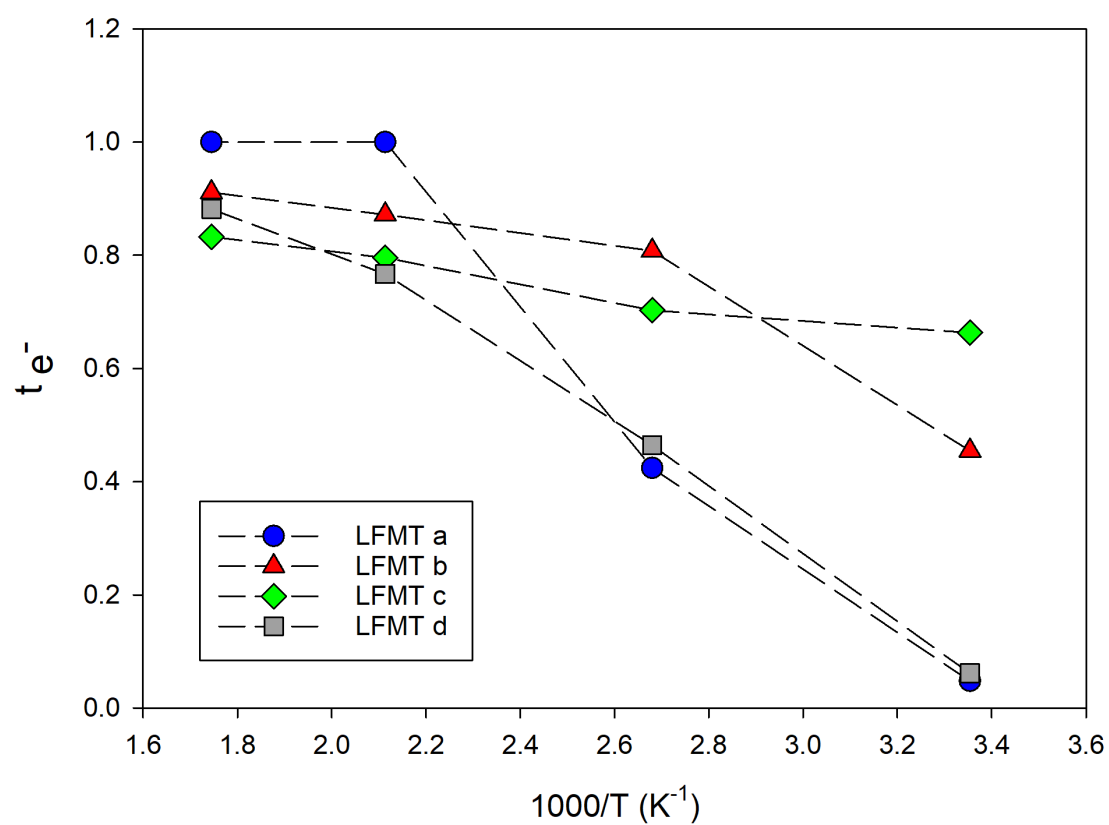

**Figure S2(II):** Electron transference numbers,  $t_e^-$ , vs T, as calculated by the respective Nyquist plots

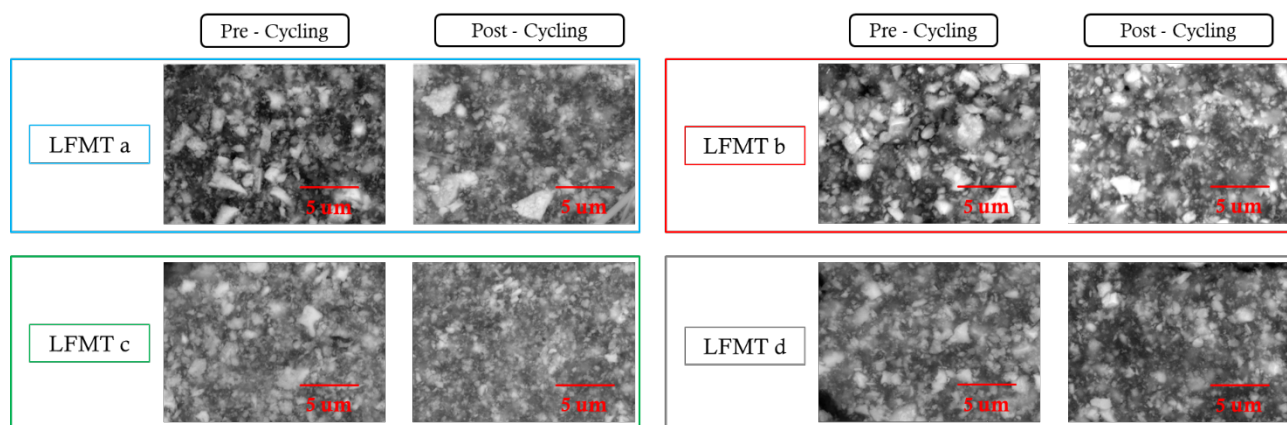

**Figure S3(I):** (Back-scattered) SEM images of the LFMT electrodes pre- and post-cycling

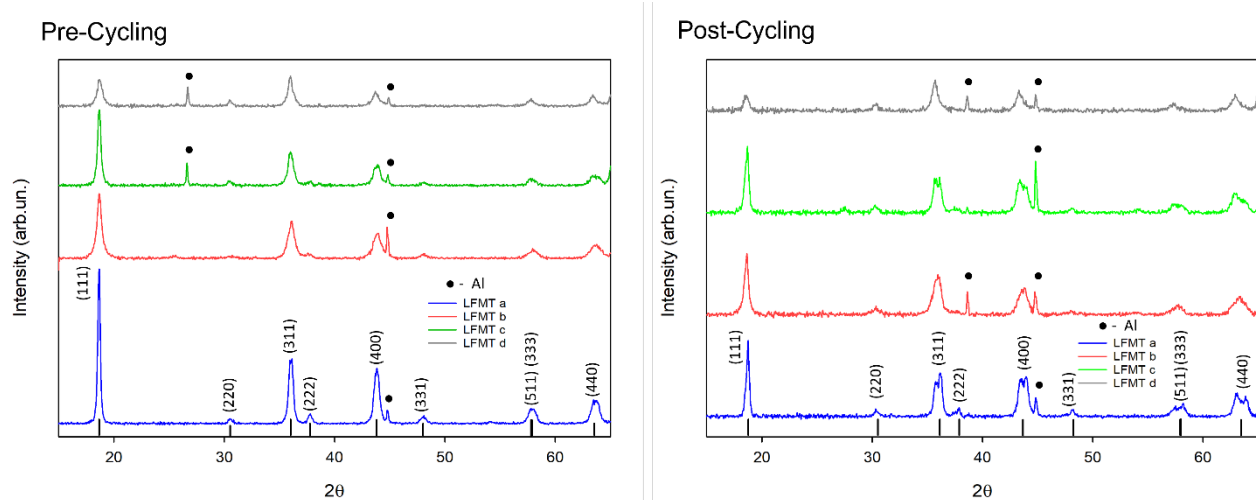

**Figure S3(II):** XRD patterns of the pre-cycled (left) and post-cycled LFMT electrodes (right). The star • in plots indicates the Al signal coming from the current collector.

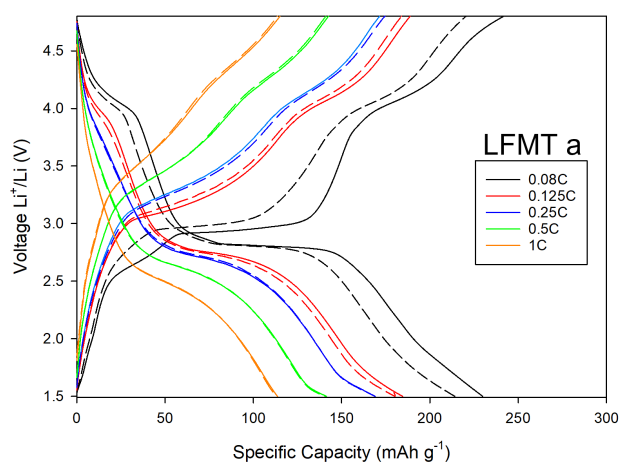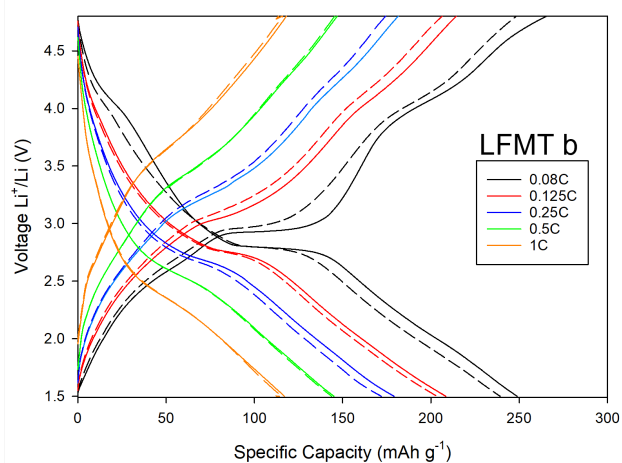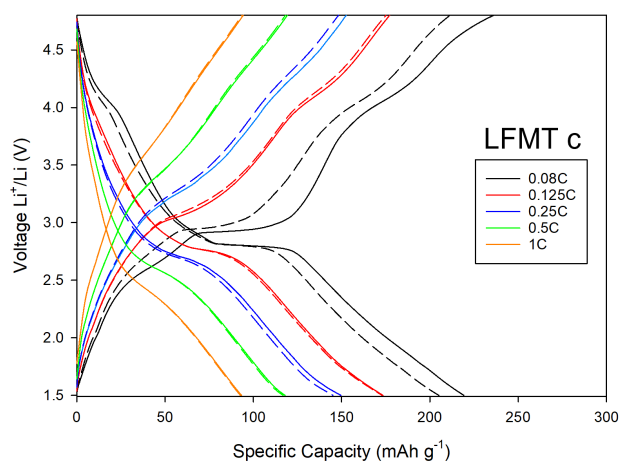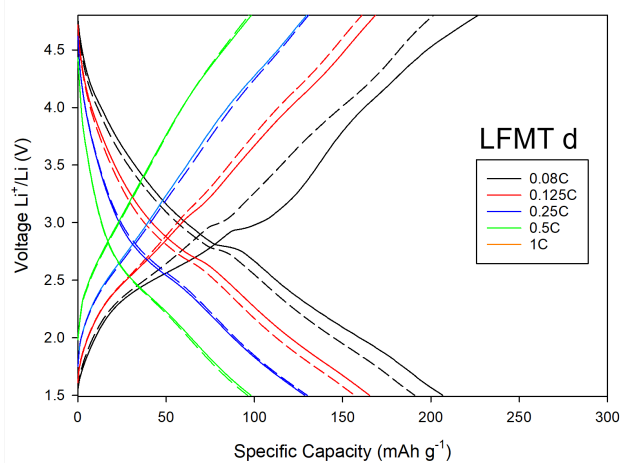

**Figure S4:** Voltage profiles of the 2<sup>nd</sup> (solid line) and 5<sup>th</sup> (dotted line) cycles at each investigated  $C_{\text{rate}}$ .

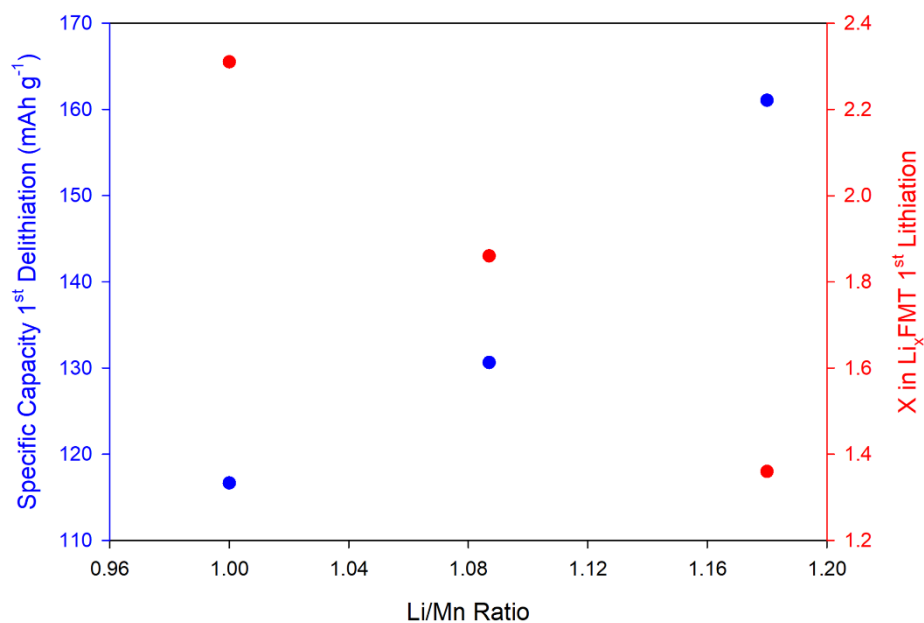

**Figure S5(I):** 1<sup>st</sup> Delithiation Capacity (blue) and Lithium stoichiometry,  $x$ , (red) as a function of the Li/Mn molar ratio in LFMTa-d cathodes.

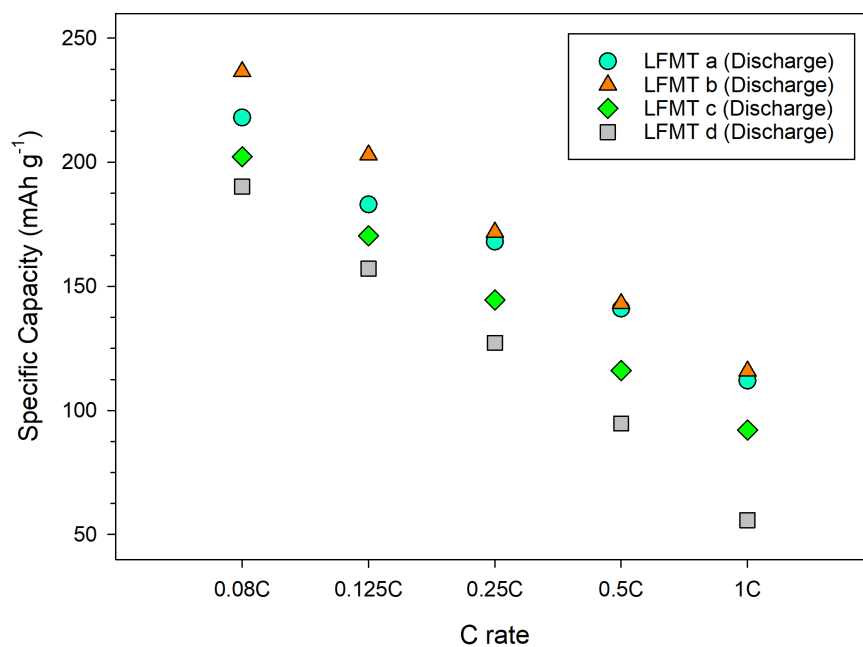

**Figure S5(II):** Discharge Capacity behavior as a function of  $C_{\text{rate}}$  in LFMTa-d cathodes.

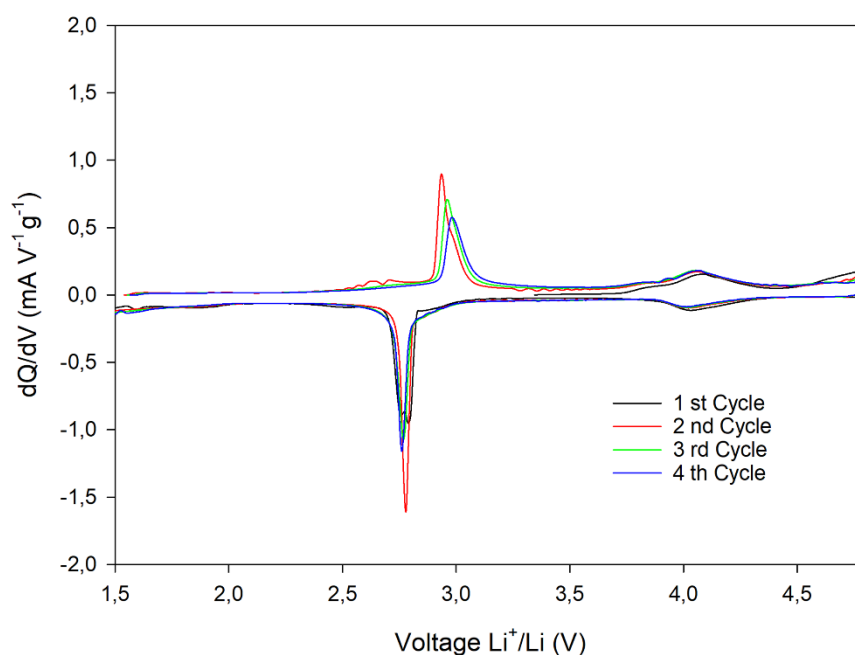

**Figure S6(I):**  $dQ/dV$  plots of LFMTa cathode with LP30 + 4% (wt%) of Succinic Anhydride as electrolyte

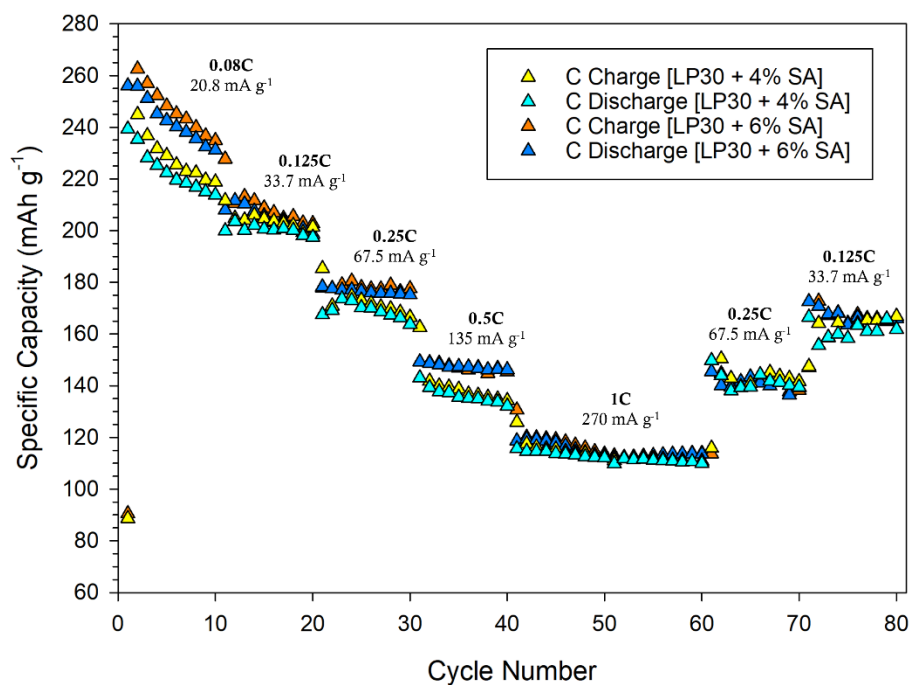

**Figure S6(II):** Galvanostatic cycling at different  $C_{Rate}$  of the cell LFMTa/electrolyte/Li. Electrolyte:  $LiPF_6$  1.0M in EC/DMC (1/1 v/v) + 4% (cyano/yellow) and 6% (wt %) (blue/red) of Succinic Anhydride.



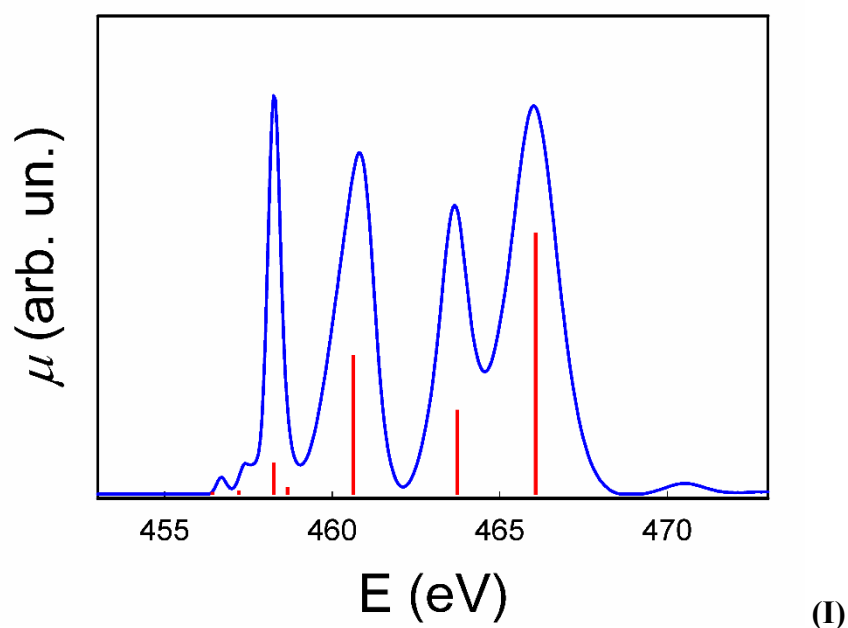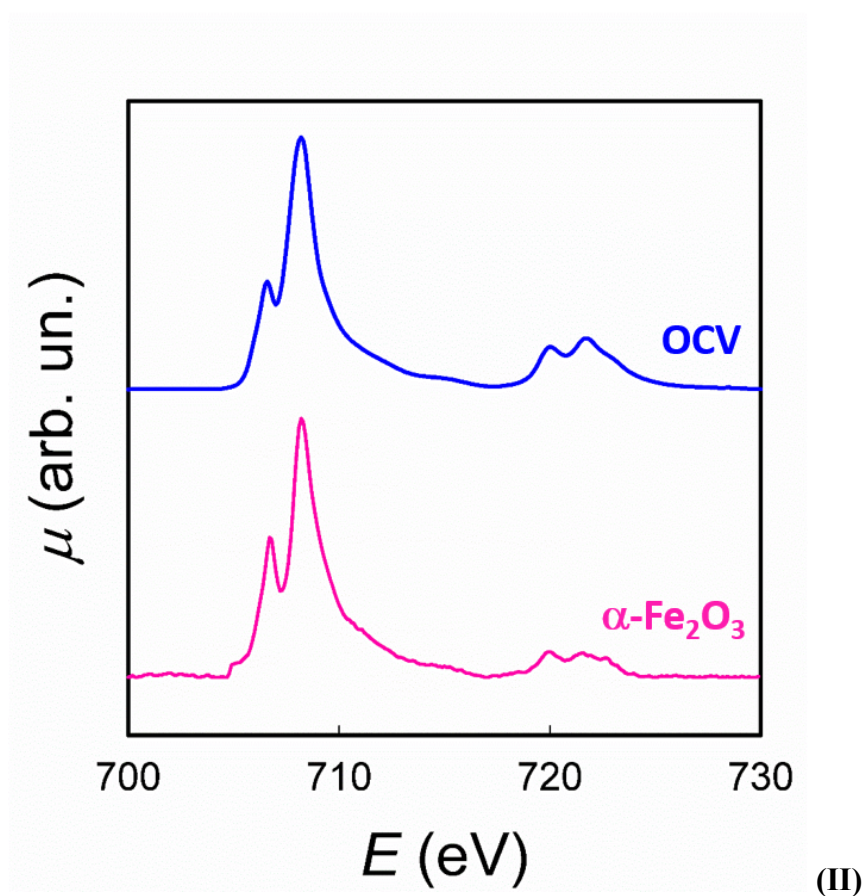

**Figure S7:** (I) Ti  $L_{2,3}$ -edges of sample LFMTc at OCV (blue line). The red bars are the multiplets calculated by means of the XTM4XAS program<sup>1</sup>, including crystal field, charge transfer, and spin-orbit coupling effects and assuming Ti in Oh environment; (II) XANES spectra at the Fe  $L_{2,3}$ -edges of LFMTc at OCV (blue line) and  $\alpha\text{-Fe}_2\text{O}_3$  (pink line), taken as reference.

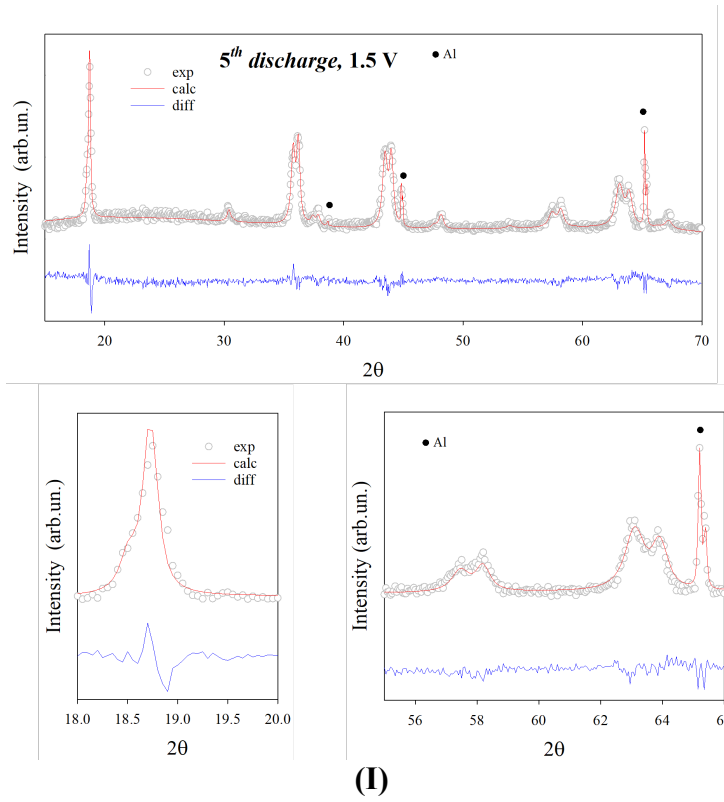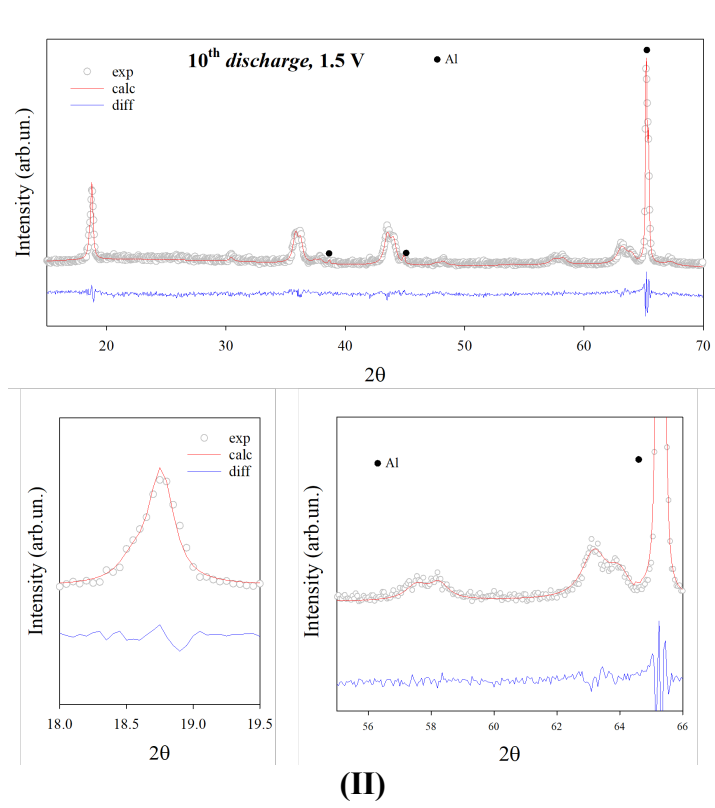

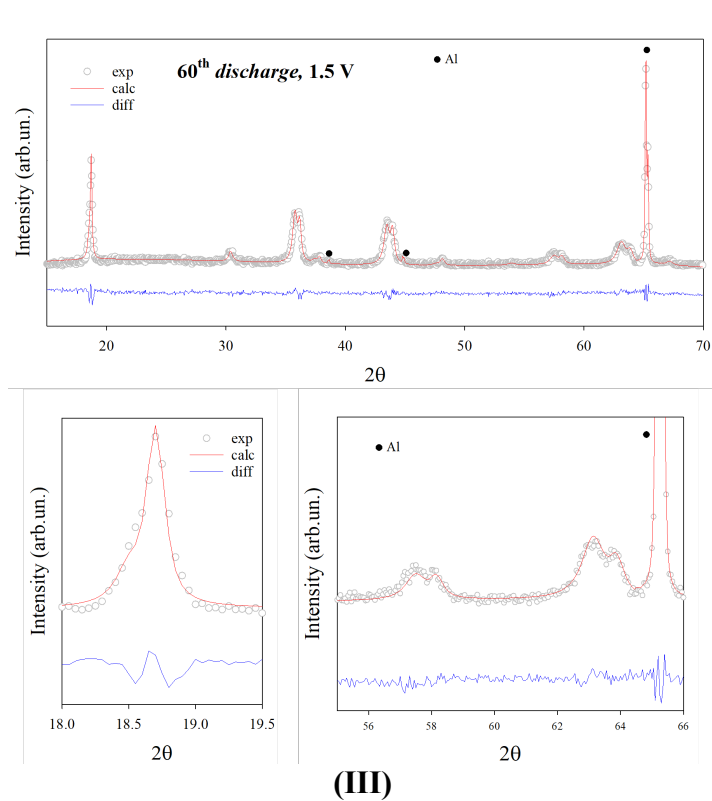

**Figure S8:** Rietveld refinements of specimen LFMTc discharged at 1.5 V after (I) 5, (II) 10 and (III) 60 electrochemical cycles, plotted full range and zoomed into different regions. Empty dots: experimental data, red solid line: calculated profile, blue solid line: difference curve. Full cycles highlight the signal of the Al support of the electrode.

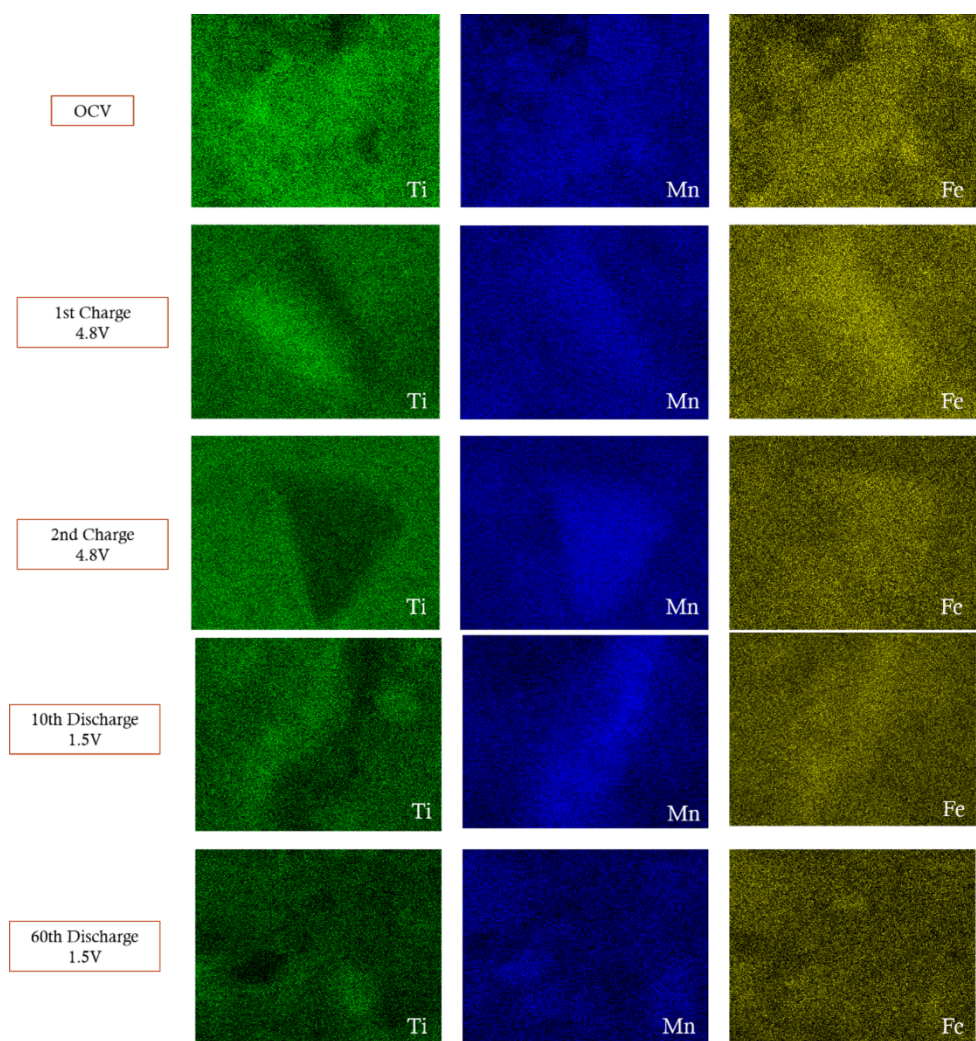

**Figure S9:** EDX TMs mapping images of the cathodes frozen at OCV, delithiated at 4.8 V and lithiated at 1.5 V at different selected cycles.

|                  | <i>i.r.t</i> (Å) | <i>i.r.o</i> (Å) |
|------------------|------------------|------------------|
| Li <sup>+</sup>  | 0.59             | 0.76             |
| Fe <sup>3+</sup> | 0.49             | 0.645            |
| Mn <sup>3+</sup> | -                | 0.645            |
| Mn <sup>4+</sup> | 0.39             | 0.53             |
| Ti <sup>4+</sup> | 0.42             | 0.605            |
| Mn <sup>2+</sup> | 0.66             | 0.83             |

**Table S1:** Ionic radii of the species of interest in tetrahedral (IV) and octahedral (VI) coordination according to Shannon.<sup>2</sup>

#### References.

1. Stavitski, E.; De Groot, F. M. F. The CTM4XAS Program for EELS and XAS Spectral Shape Analysis of Transition Metal L edges. *Micron*, 2010, 41, 687– 94.
2. R.D. Shannon, "Revised Effective Ionic Radii and Systematic Studies of Interatomic Distances in Halides and Chalcogenides", *Acta Cryst.* 1976, A32, 751-767.
